# Supplementary material for: Revealing the Molecular Portrait of Triple Negative Breast Tumors in an Understudied Population through Omics Analysis of Formalin-Fixed and Paraffin-Embedded Tissues
Source: PubMed Central journal article supplement (PMC4427337; doi:10.1371/journal.pone.0126762), 2015-05-11

**S2 Figure. DNA repair genes mutated and sample mutation load.** For each sample the burden of somatic mutations was plotted against the total number of DNA repair genes with pathogenic mutations. Pearson correlation is shown (n = 12).

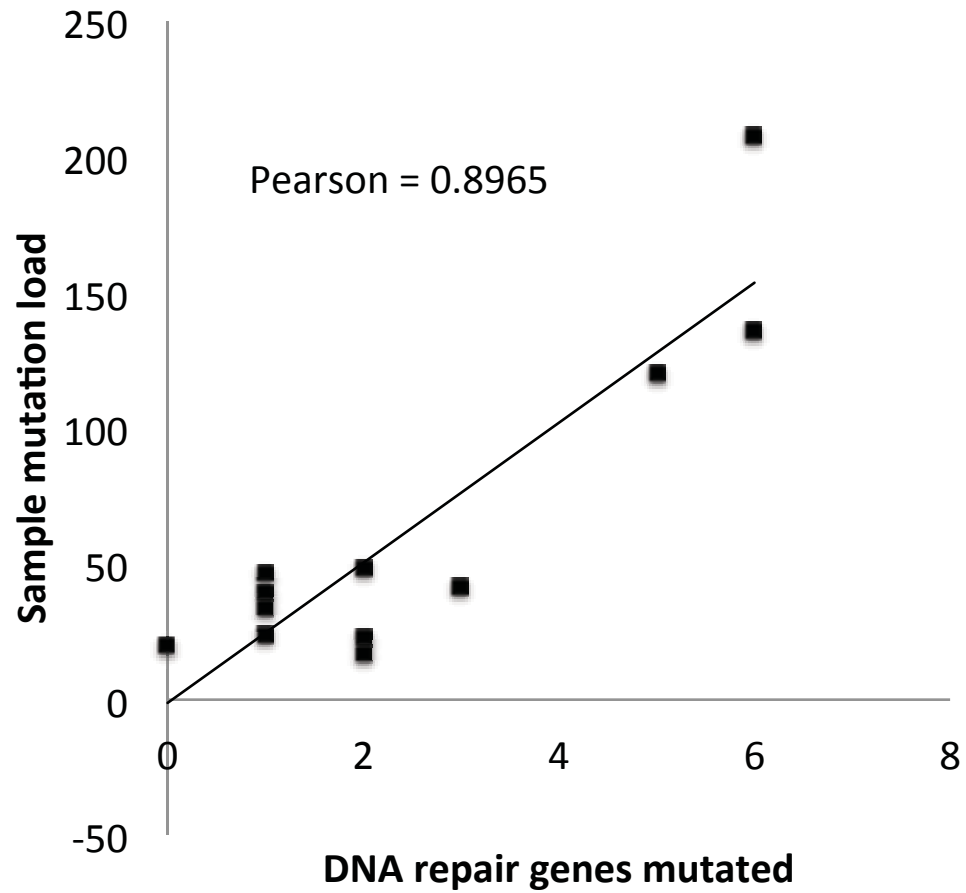

Supplement: pone.0126762.s002.pdf [file pone.0126762.s002.pdf]
